# Supplementary material
Source: PubMed Central journal article supplement (PMC4177267)
Supplement: NIHMS626107-supplement.pdf [file NIHMS626107-supplement.pdf]

**Supplemental Table 1.** *Raw scores on external variables for entire sample (N=151)*

|                               | Mean (SD)   |
|-------------------------------|-------------|
| SAS Social Aloofness          | 2.8 (1.8)   |
| SAS Close Friends Not Valued  | 1.5 (1.6)   |
| SAS Prefers Solitude          | 1.7 (1.6)   |
| TEPS Anticipatory*            | 4.4 (0.9)   |
| TEPS Consummatory*            | 4.5 (0.9)   |
| BPRS Positive                 | 1.9 (0.8)   |
| BPRS Depression               | 1.9 (0.8)   |
| CAINS Expression              | 4.8 (3.7)   |
| CAINS MAP                     | 15.8 (6.8)  |
| RFS Work/Independent Living*  | 4.4 (1.5)   |
| RFS Family/Social Network*    | 4.8 (1.5)   |
| UPSA-B (Functional Capacity)* | 28.9 (14.3) |

Note: \* Denotes scales on which higher raw scores indicate better functioning
